# Supplementary material for: Numerical Simulation of S-Shaped Current–Voltage Curves Induced by Electron Traps in Inverted Organic Photovoltaics
Source: MDPI journal article supplement (doi:10.3390/ijms23042039), 2022-02-12
Supplement: s1 [file s1]

## Supporting Information

### Numerical Simulation of S-Shaped Current - Voltage Curves Induced by Electron Traps in Inverted Organic Photovoltaics

Shanglin Luo <sup>1</sup>, Mingfang Huo <sup>1</sup>, Qin Xue <sup>1,\*</sup>, and Guohua Xie <sup>2,\*</sup>

<sup>1</sup> Department of Physical Science and Technology, Central China Normal University, Wuhan 430079, China

<sup>2</sup> Sauvage Center for Molecular Sciences, Hubei Key Lab on Organic and Polymeric Optoelectronics Materials, Department of Chemistry, Wuhan University, Wuhan 430072, China

\* Correspondence: [xueqin@mail.ccnu.edu.cn](mailto:xueqin@mail.ccnu.edu.cn) (Q.X.) and [guohua.xie@whu.edu.cn](mailto:guohua.xie@whu.edu.cn) (G.X.);

#### List of physical parameters and symbols.

Elementary charge:  $q$

Potential barrier:  $\varphi$

Permeability in free space:  $\varepsilon_0$

Relative dielectric permeability:  $\varepsilon_r$

Concentrations of trapped electrons:  $n_t$

Concentrations of trapped holes:  $p_t$

Concentration of the ionized donors:  $N_D^+$

Concentration of the ionized acceptors:  $N_A^-$

Diffusion coefficients of electrons:  $D_n$

Diffusion coefficients of holes:  $D_p$

Electrical field:  $F$

Electron current density:  $J_n$

Hole current density:  $J_p$

Generation rates of free charge carriers:  $G$

Recombination rates of free charge carriers:  $R$

Effective energy offset inside the active layer:  $E_{gap}$

Intrinsic density of states at the conduction band:  $N_c$

Intrinsic density of states at the valence band:  $N_v$

Boltzmann constant:  $k$

Absolute temperature:  $T$

Electron mobility:  $\mu_n$

Hole mobility:  $\mu_p$

Surface recombination velocity of electrons (cathode side):  $S_{n,cat}$

Surface recombination velocity of holes (cathode side):  $S_{p,cat}$

Surface recombination velocity of electrons (anode side):  $S_{n,an}$

Surface recombination velocity of holes (anode side):  $S_{p,an}$

Energy level of the lowest unoccupied molecular orbital:  $E_{LUMO}$

Energy level of the highest occupied molecular orbital:  $E_{HOMO}$

Quasi-Fermi level for electrons:  $E_{Fn}$

Quasi-Fermi level for holes:  $E_{Fp}$

Open-circuit voltage:  $V_{OC}$

Short-circuit current:  $J_{SC}$

Thickness of the active layer:  $d$

Thickness of the negatively charged region:  $d_c$

Effective electron injection barrier:  $\phi_{1,eff}$

Effective built-in voltage:  $V_{bi,eff}$

Energy offset:  $\Delta$

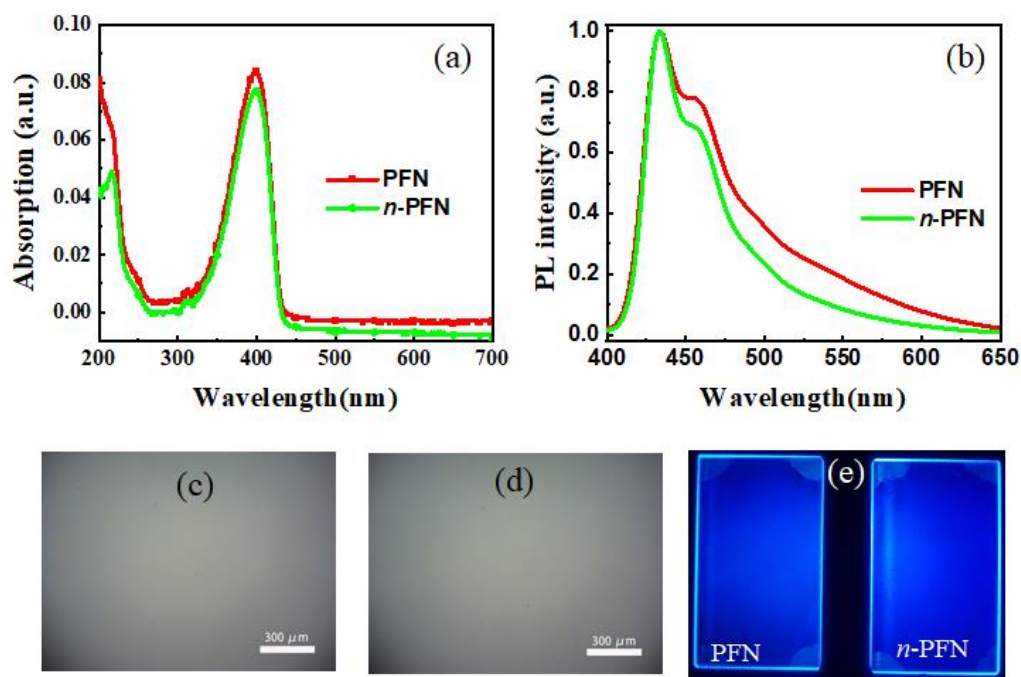

Figure S1. Absorption (a) and steady-state photoluminescence (b) of PFN and PFN:Cs<sub>2</sub>CO<sub>3</sub> (5:1) spin-coated on quartz substrates. (c) PFN and (d) PFN:Cs<sub>2</sub>CO<sub>3</sub> films captured by a microscope. (e) Photos of the films under UV 365 nm.

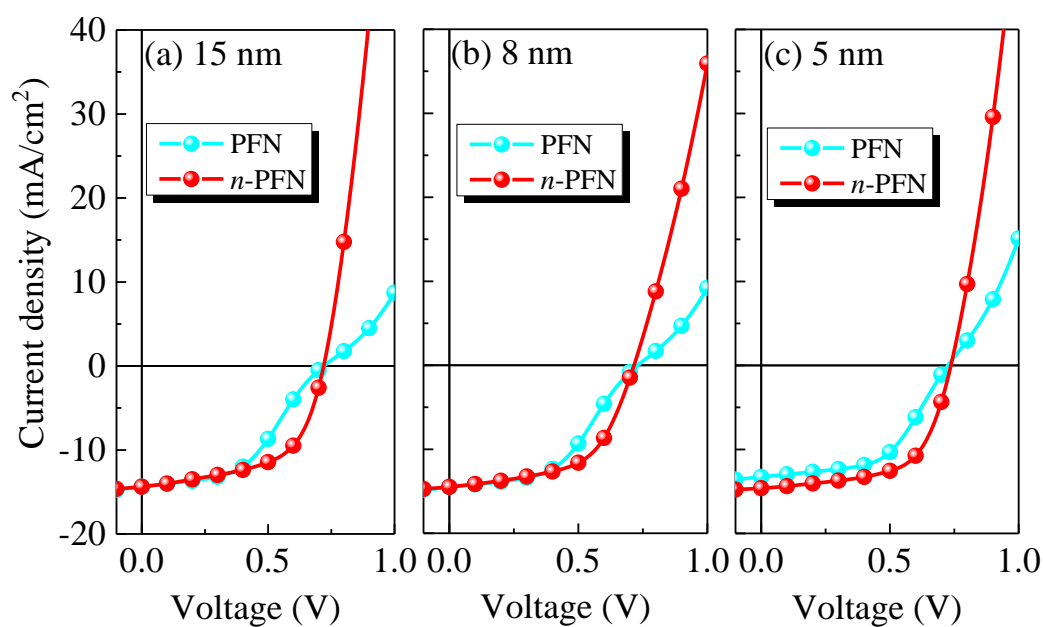

Figure S2. *J-V* curves of the devices with different thickness of the electron extraction layer: (a) 15 nm, (b) 8 nm, and (c) 5 nm.

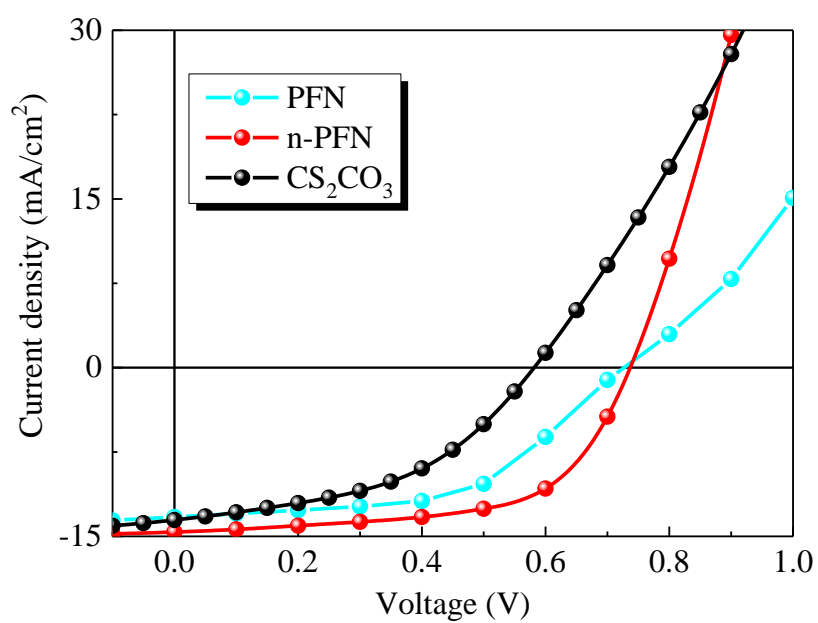

Figure S3. J-V curves of the devices with PFN (5 nm), PFN:CS<sub>2</sub>CO<sub>3</sub> (5 nm), and CS<sub>2</sub>CO<sub>3</sub> (1 nm).
